# Supplementary material
Source: publisher figshare collection journal article supplement (https://gsajournals.figshare.com/articles/dataset/_/8126930)
Supplement: Supplementary file 1 [file 1]

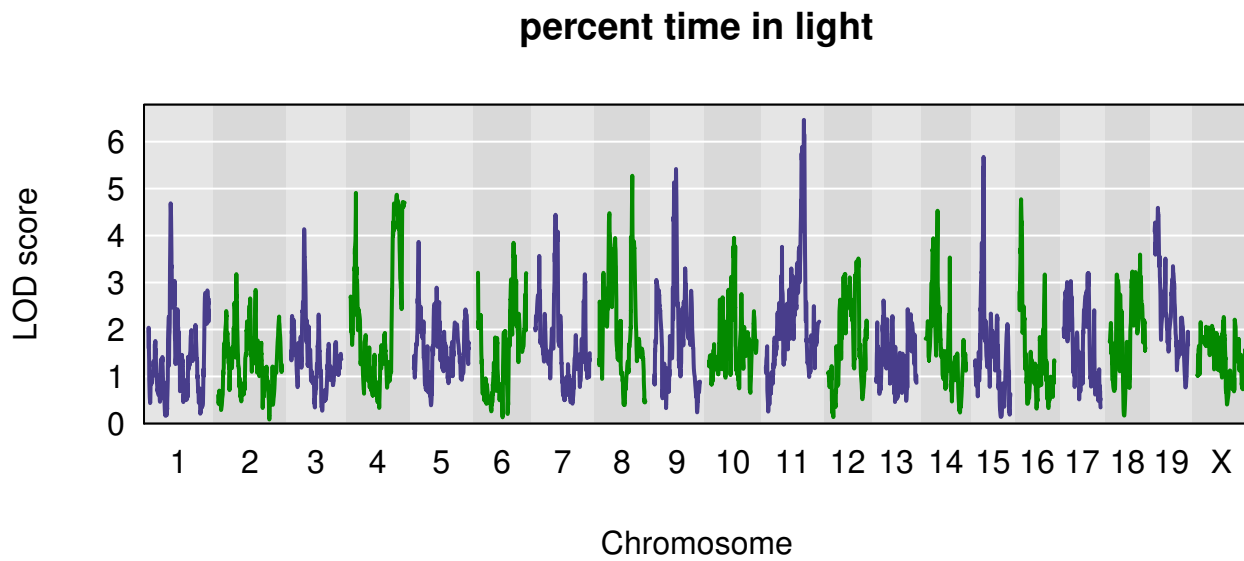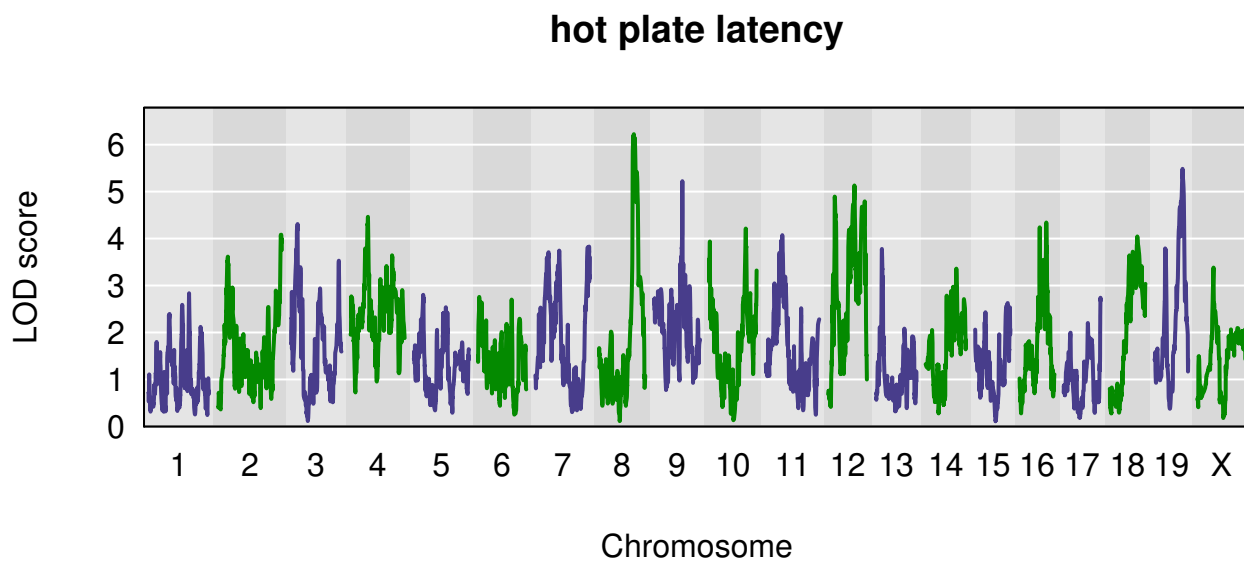

**Figure S2** Genome-wide QTL scan for percent time in light reveals multiple QTL, including one on Chromosome 8.
