# Supplementary material
Source: publisher figshare collection journal article supplement (https://gsajournals.figshare.com/articles/dataset/_/8126930)
Supplement: Supplementary file 2 [file 1]

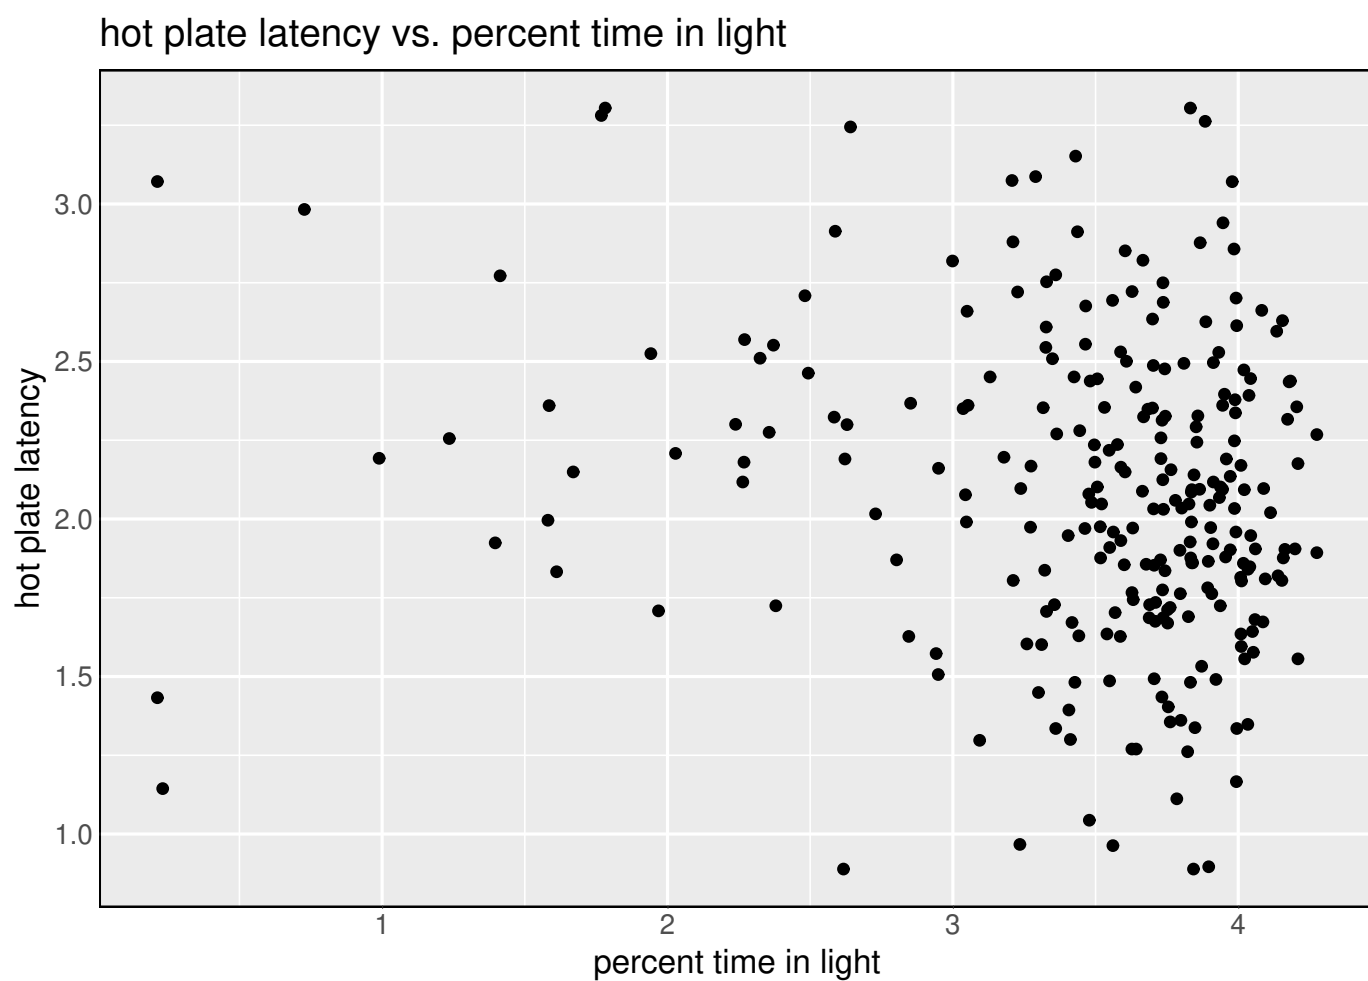

**Figure S1** Scatter plot of “hot plate latency” against “percent time in light”, after applying logarithm transformations and winsorizing both traits.
