# Supplementary material
Source: publisher figshare collection journal article supplement (https://gsajournals.figshare.com/articles/dataset/_/8126930)
Supplement: Supplementary file 3 [file 1]

**Table S1** Eight founder lines and their one-letter abbreviations.

| Founder allele | One-letter abbreviation |
|----------------|-------------------------|
| A/J            | A                       |
| C57BL/6J       | B                       |
| 129S1/SvImJ    | C                       |
| NOD/ShiLtJ     | D                       |
| NZO/H1LTJ      | E                       |
| Cast/EiJ       | F                       |
| PWK/PhJ        | G                       |
| WSB/EiJ        | H                       |
