# Supplementary material
Source: publisher figshare collection journal article supplement (https://gsajournals.figshare.com/articles/dataset/_/8126930)
Supplement: Supplementary file 4 [file 1]

**Table S2** Both “hot plate latency” and “percent time in light” demonstrate multiple QTL peaks with LOD scores above 5.

| phenotype             | chr | pos   | LOD score |
|-----------------------|-----|-------|-----------|
| percent time in light | 8   | 55.28 | 5.27      |
| hot plate latency     | 8   | 57.77 | 6.22      |
| percent time in light | 9   | 36.70 | 5.42      |
| hot plate latency     | 9   | 46.85 | 5.22      |
| percent time in light | 11  | 63.39 | 6.46      |
| hot plate latency     | 12  | 43.52 | 5.13      |
| percent time in light | 15  | 15.24 | 5.67      |
| hot plate latency     | 19  | 47.80 | 5.48      |
